# Supplementary material for: A simple method for the synthesis of copper nanoparticles from metastable intermediates
Source: Royal Society of Chemistry journal article supplement (doi:10.1039/d3ra01082a), 2023-01-01
Supplement: d3ra01082a1.pdf [file d3ra01082a1.pdf]

*Supporting Information*

# A Simple Method for Synthesis of Copper Nanoparticles from Metastable Intermediates

Ruihan Lu<sup>1</sup>, Wuchang Hao<sup>2</sup>, Long Kong<sup>1</sup>, Keliang Zhao<sup>3</sup>, Hao Bai<sup>3</sup>, Zhengguo Liu<sup>1,\*</sup>

*Printing Electronics Center for Flexible Electronics, Institute of Flexible Electronics (IFE), Northwestern Polytechnical University, 1 Dongxiang Road, Xi'an, 710129, China.*

E-mail: iamzgliu@nwpu.edu.cn

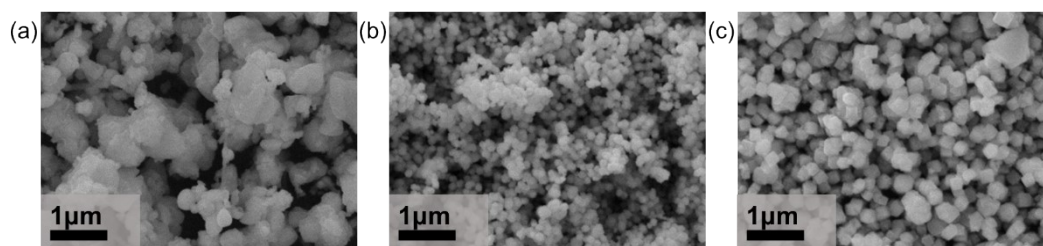

**Fig S1.** SEM images of 100000 magnification using the PVP molecular weight of (a) 10000; (b) 40000 and (c) 1300000.

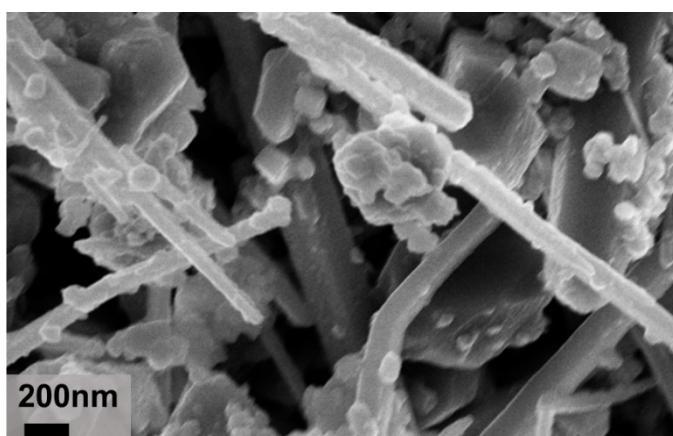

**Fig S2.** FESEM image of copper nanoparticles after 160 minutes of reaction.
